# Supplementary material for: Comparative analysis of diagnostic ultrasound and histopathology for detecting cervical lymph node metastases in head and neck cancer
Source: Springer Nature journal article supplement (doi:10.1007/s00432-023-05439-x), 2023-10-12

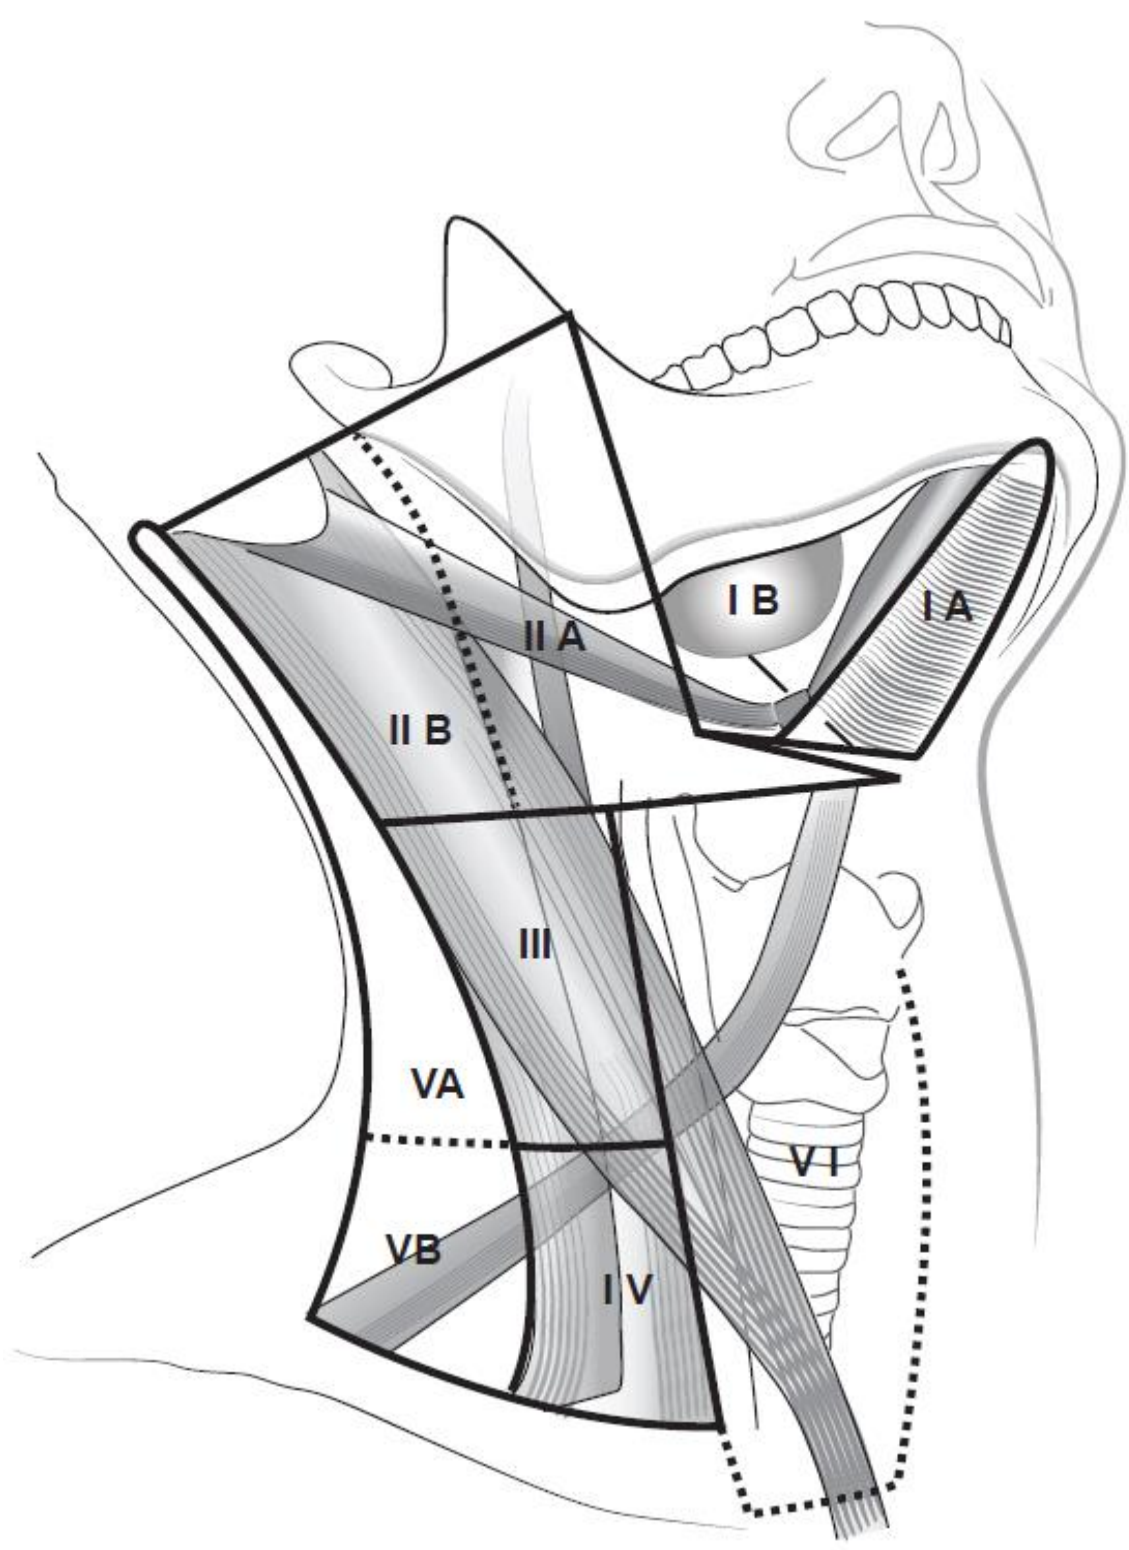

Supplement: MOESM2 [file 26157238]
