# Supplementary material for: Comparative analysis of diagnostic ultrasound and histopathology for detecting cervical lymph node metastases in head and neck cancer
Source: Springer Nature journal article supplement (doi:10.1007/s00432-023-05439-x), 2023-10-12
Supplement: MOESM5 [file 26157238]

## Case Report Form Data

Program: KKSD/KKSD

Protocol : LYMPHSONO/DE (Lymphknoten-Sonographie Register)

Date: 30.07.2015 12:43:59 CEST

User: SPROLL

From Patient ID : To Patient ID :

**Program:** KKSD/KKSD  
**Center :** DDORF  
**Event ID :** EE  
**Page Entry Status:** V

**Protocol :** LYMPHSONO/DE  
**Patient ID :** 225  
**Page ID :** Operation (Ersterkrankung)

**-- Module OP (Operation (Ersterkrankung)) --**

**Geburtsdatum** 20.06.1951

**Geschlecht**  männlich  weiblich

**Frühere maligne Tumoren**

- |                                            |                                                |                                                       |
|--------------------------------------------|------------------------------------------------|-------------------------------------------------------|
| <input checked="" type="checkbox"/> 0-nein | <input type="checkbox"/> 1-Kopf-Hals-Karzinom  | <input type="checkbox"/> 7-Gynäkologische Tumoren     |
|                                            | <input type="checkbox"/> 2-Verdauungstrakt     | <input type="checkbox"/> 8-Urologische Tumoren        |
|                                            | <input type="checkbox"/> 3-Lunge, Pleura       | <input type="checkbox"/> 9-Nebennierenrinden-Tumoren  |
|                                            | <input type="checkbox"/> 4-Knochen, Weichteile | <input type="checkbox"/> 10-Ophthalmologische Tumoren |
|                                            | <input type="checkbox"/> 5-Haut                | <input type="checkbox"/> 11-Morbus Hodgkin            |
|                                            | <input type="checkbox"/> 6-Brust               | <input type="checkbox"/> 12-NHL                       |

**Datum der Ultraschalluntersuchung präoperativ** 30.01.2015

|                                                              |       | <b>Anzahl der<br/>untersuchten<br/>LK</b> | <b>davon<br/>positiv</b> |
|--------------------------------------------------------------|-------|-------------------------------------------|--------------------------|
| (r)uT-Stadium allein aufgrund der<br>Ultraschalluntersuchung | T1 T1 |                                           |                          |
| (r)uN-Stadium allein aufgrund des Solbiati-Index             | N1 N1 | 8                                         | 1                        |
| (r)uN-Stadium allein aufgrund des Roundness-Index            | N0 N0 | 8                                         | 0                        |
| (r)uN-Stadium aufgrund des gesamten Sonobefundes             | N0 N0 | 16                                        | 0                        |

**OP-Datum** 11.02.2015

**Art der Tumoroperation (Teilresektion)**

- |                                                                            |                                                                 |
|----------------------------------------------------------------------------|-----------------------------------------------------------------|
| <input type="checkbox"/> 1-Mundboden                                       | <input type="checkbox"/> 17-Oberkiefer und Wange(n)             |
| <input type="checkbox"/> 2-Zunge                                           | <input type="checkbox"/> 18-Unterkiefer und Wange(n)            |
| <input type="checkbox"/> 3-Unterkiefer                                     | <input type="checkbox"/> 19-Oberkiefer und Weichgaumen          |
| <input type="checkbox"/> 4-Oberkiefer                                      | <input type="checkbox"/> 20-Oberkiefer, Pharynx und Unterkiefer |
| <input type="checkbox"/> 5-Wange(n)                                        | <input type="checkbox"/> 21-Weichgaumen und Pharynx             |
| <input type="checkbox"/> 6-Vestibulum                                      | <input type="checkbox"/> 22-Skalp                               |
| <input type="checkbox"/> 7-Lippen                                          | <input type="checkbox"/> 23-Oberlid                             |
| <input type="checkbox"/> 8-Weichgaumen                                     | <input type="checkbox"/> 24-Unterland                           |
| <input type="checkbox"/> 9-Mundboden und Zunge                             | <input type="checkbox"/> 25-Ohr                                 |
| <input type="checkbox"/> 10-Mundboden, Unterkiefer und Vestibulum          | <input type="checkbox"/> 26-Nase                                |
| <input type="checkbox"/> 11-Mundboden und Unterkiefer                      | <input type="checkbox"/> 27-Nase, Weich- und Hartgaumen         |
| <input checked="" type="checkbox"/> 12-Mundboden, Unterkiefer und Wange(n) | <input type="checkbox"/> 28-Orbita                              |
| <input type="checkbox"/> 13-Mundboden, Zunge und Unterkiefer               | <input type="checkbox"/> 29-Hypopharynx                         |
| <input type="checkbox"/> 14-Lippen und Vestibulum                          | <input type="checkbox"/> 30-Oropharynx                          |
| <input type="checkbox"/> 15-Lippen, Vestibulum und Unterkiefer             | <input type="checkbox"/> 31-Tonsille                            |
| <input type="checkbox"/> 16-Lippen, Vestibulum und Oberkiefer              |                                                                 |

**Seite der Tumoroperation**

links  rechts  beidseits

**Art der Lymphknotenausräumung (links)**

- |                                                         |                                                |                                     |
|---------------------------------------------------------|------------------------------------------------|-------------------------------------|
| <input type="checkbox"/> Radikale Neck Dissection       |                                                |                                     |
| <input type="checkbox"/> Konservierende Neck Dissection |                                                |                                     |
| <input type="checkbox"/> Selektive Neck Dissection      |                                                |                                     |
| <b>Ia</b> <input checked="" type="checkbox"/>           | <b>III</b> <input checked="" type="checkbox"/> | <b>VI</b> <input type="checkbox"/>  |
| <b>Ib</b> <input checked="" type="checkbox"/>           | <b>IV</b> <input type="checkbox"/>             | <b>VII</b> <input type="checkbox"/> |
| <b>Ila</b> <input checked="" type="checkbox"/>          | <b>Va</b> <input type="checkbox"/>             |                                     |
| <b>Ilb</b> <input checked="" type="checkbox"/>          | <b>Vb</b> <input type="checkbox"/>             |                                     |

**Completed:**

**Date:**

**Program:** KKSD/KKSD  
**Center :** DDORF  
**Event ID :** EE  
**Page Entry Status:** V

**Protocol :** LYMPHSONO/DE  
**Patient ID :** 225  
**Page ID :** Operation (Ersterkrankung)

**Ausräumung**

- |                                           |                                             |
|-------------------------------------------|---------------------------------------------|
| <input type="checkbox"/> 1-Bukzinator     | <input type="checkbox"/> 6-infraklavikulär  |
| <input type="checkbox"/> 2-periparotideal | <input type="checkbox"/> 7-Axilla Regio I   |
| <input type="checkbox"/> 3-parotideal     | <input type="checkbox"/> 8-Axilla Regio II  |
| <input type="checkbox"/> 4-retroaurikulär | <input type="checkbox"/> 9-Axilla Regio III |
| <input type="checkbox"/> 5-subokzipital   | <input type="checkbox"/> 10-mediastinal     |

**Art der Lymphknotenausräumung (rechts)**

- Radikale Neck Dissection  
 Konservierende Neck Dissection  
 Selektive Neck Dissection
- |                              |                              |                              |
|------------------------------|------------------------------|------------------------------|
| Ia <input type="checkbox"/>  | III <input type="checkbox"/> | VI <input type="checkbox"/>  |
| Ib <input type="checkbox"/>  | IV <input type="checkbox"/>  | VII <input type="checkbox"/> |
| IIa <input type="checkbox"/> | Va <input type="checkbox"/>  |                              |
| IIb <input type="checkbox"/> | Vb <input type="checkbox"/>  |                              |

**Ausräumung**

- |                                           |                                             |
|-------------------------------------------|---------------------------------------------|
| <input type="checkbox"/> 1-Bukzinator     | <input type="checkbox"/> 6-infraklavikulär  |
| <input type="checkbox"/> 2-periparotideal | <input type="checkbox"/> 7-Axilla Regio I   |
| <input type="checkbox"/> 3-parotideal     | <input type="checkbox"/> 8-Axilla Regio II  |
| <input type="checkbox"/> 4-retroaurikulär | <input type="checkbox"/> 9-Axilla Regio III |
| <input type="checkbox"/> 5-subokzipital   | <input type="checkbox"/> 10-mediastinal     |

**pT-Stadium** T1 T1  
**pN-Stadium** N0 N0  
**M-Stadium** pM0 pM0  
**L-Stadium** L0 L0  
**V-Stadium** V0 V0  
**Pn-Stadium** Pn0 Pn0  
**G-Stadium** G2 G2  
**R-Stadium** R0 R0

**Anzahl der histopathologisch untersuchten Lymphknoten**  
 8  
 davon positiv 0

**Primärtumor vorhanden?**  ja  nein  
**Länge des Tumors in cm** 19  
**Breite des Tumors in cm** 15  
**Dicke des Tumors in cm** 15  
**Topographischer ICD-O-Code des Primärtumors** C03.1L  
**Morphologischer ICD-O-Code des Primärtumors** 8071/3

**Übereinstimmung Solbiati-Index vs. pN-Stadium**

- |                                                          |                                      |                                                                      |
|----------------------------------------------------------|--------------------------------------|----------------------------------------------------------------------|
| <input type="checkbox"/> ja                              | <b>positive LK</b>                   | 1                                                                    |
| <input checked="" type="checkbox"/> überschätzt          | <b>histopathologisch positive LK</b> | 0                                                                    |
| <input type="checkbox"/> unterschätzt                    | <b>falsch positive LK</b>            | 1                                                                    |
|                                                          | <b>falsch negative LK</b>            | 0                                                                    |
|                                                          | <b>Differierende LK</b>              | 1                                                                    |
| <b>Richtige Entscheidung aufgrund einer Fehldiagnose</b> |                                      | <input type="checkbox"/> ja <input checked="" type="checkbox"/> nein |

**Übereinstimmung Roundness-Index vs. pN-Stadium**

- |                                                          |                                      |                                                                      |
|----------------------------------------------------------|--------------------------------------|----------------------------------------------------------------------|
| <input checked="" type="checkbox"/> ja                   | <b>positive LK</b>                   | 0                                                                    |
| <input type="checkbox"/> überschätzt                     | <b>histopathologisch positive LK</b> | 0                                                                    |
| <input type="checkbox"/> unterschätzt                    | <b>falsch positive LK</b>            | 0                                                                    |
|                                                          | <b>falsch negative LK</b>            | 0                                                                    |
|                                                          | <b>Differierende LK</b>              | 0                                                                    |
| <b>Richtige Entscheidung aufgrund einer Fehldiagnose</b> |                                      | <input type="checkbox"/> ja <input checked="" type="checkbox"/> nein |

**Program:** KKSD/KKSD  
**Center :** DDORF  
**Event ID :** EE  
**Page Entry Status:** V

**Protocol :** LYMPHSONO/DE  
**Patient ID :** 225  
**Page ID :** Operation (Ersterkrankung)

#### Übereinstimmung Sonobefund subjektiv vs. pN-Stadium

|                                        |                                                   |                             |                                          |
|----------------------------------------|---------------------------------------------------|-----------------------------|------------------------------------------|
| <input checked="" type="checkbox"/> ja | positive LK                                       | 0                           |                                          |
| <input type="checkbox"/> überschätzt   | histopathologisch positive LK                     | 0                           |                                          |
| <input type="checkbox"/> unterschätzt  | falsch positive LK                                | 0                           |                                          |
|                                        | falsch negative LK                                | 0                           |                                          |
|                                        | Differierende LK                                  | 0                           |                                          |
|                                        | Richtige Entscheidung aufgrund einer Fehldiagnose | <input type="checkbox"/> ja | <input checked="" type="checkbox"/> nein |

#### Übereinstimmung Solbiati-Index vs. pN0/pN+-Stadium

|                                                 |                                                   |                             |                                          |
|-------------------------------------------------|---------------------------------------------------|-----------------------------|------------------------------------------|
| <input type="checkbox"/> ja                     | Richtige Entscheidung aufgrund einer Fehldiagnose | <input type="checkbox"/> ja | <input checked="" type="checkbox"/> nein |
| <input checked="" type="checkbox"/> überschätzt |                                                   |                             |                                          |
| <input type="checkbox"/> unterschätzt           |                                                   |                             |                                          |

#### Übereinstimmung Roundness-Index vs. pN0/pN+-Stadium

|                                        |                                                   |                             |                                          |
|----------------------------------------|---------------------------------------------------|-----------------------------|------------------------------------------|
| <input checked="" type="checkbox"/> ja | Richtige Entscheidung aufgrund einer Fehldiagnose | <input type="checkbox"/> ja | <input checked="" type="checkbox"/> nein |
| <input type="checkbox"/> überschätzt   |                                                   |                             |                                          |
| <input type="checkbox"/> unterschätzt  |                                                   |                             |                                          |

#### Übereinstimmung Sonobefund subjektiv vs. pN0/pN+-Stadium

|                                        |                                                   |                             |                                          |
|----------------------------------------|---------------------------------------------------|-----------------------------|------------------------------------------|
| <input checked="" type="checkbox"/> ja | Richtige Entscheidung aufgrund einer Fehldiagnose | <input type="checkbox"/> ja | <input checked="" type="checkbox"/> nein |
| <input type="checkbox"/> überschätzt   |                                                   |                             |                                          |
| <input type="checkbox"/> unterschätzt  |                                                   |                             |                                          |

#### Bestrahlung

|                         |                                        |                                          |                       |    |
|-------------------------|----------------------------------------|------------------------------------------|-----------------------|----|
| <b>Primarius</b>        | <input checked="" type="checkbox"/> ja | <input type="checkbox"/> nein            | <b>ad [Gy]</b>        | 66 |
| <b>Lymphabflußweg e</b> | <input type="checkbox"/> ja            | <input checked="" type="checkbox"/> nein | <b>links ad [Gy]</b>  |    |
|                         |                                        |                                          | <b>rechts ad [Gy]</b> |    |

#### Chemotherapie welche

|                                                                 |                                          |
|-----------------------------------------------------------------|------------------------------------------|
| <input type="checkbox"/> ja                                     | <input checked="" type="checkbox"/> nein |
| <input type="checkbox"/> 2 Zyklen 5-FU, Cisplatin               |                                          |
| <input type="checkbox"/> Docetaxel + Cisplatin                  |                                          |
| <input type="checkbox"/> ACCRA-HN (Cetuximab,Cispt,5-FU,adjuv.) |                                          |
| <input type="checkbox"/> HART-A (5-FU, Mitomycin)               |                                          |
| <input type="checkbox"/> HART-B (5-FU, Cisplatin)               |                                          |
| <input type="checkbox"/> andere                                 |                                          |
