# Supplementary material for: Comparative analysis of diagnostic ultrasound and histopathology for detecting cervical lymph node metastases in head and neck cancer
Source: Springer Nature journal article supplement (doi:10.1007/s00432-023-05439-x), 2023-10-12
Supplement: MOESM12 [file 26157238]

| Patient | Submission number in pathology | Location of the LN (AAO-AHNS LN level) | Specimen No. | LN size in Ultrasound (kxkd1xkd2 in mm) | Assessment based on B-scan ultrasonography (0=negative; 1=positive). | Histology (0=negative, 1=positive) | LN size in Histology (mm) | Metastasis size in Histology (mm) | cN stage (based on the subjective ultrasound findings) | pN-stage         | Correspondence sonofindings vs. pathofindings 0 = yes; 1 = overestimated; 2 = underestimated. | Remarks                                                        |
|---------|--------------------------------|----------------------------------------|--------------|-----------------------------------------|----------------------------------------------------------------------|------------------------------------|---------------------------|-----------------------------------|--------------------------------------------------------|------------------|-----------------------------------------------------------------------------------------------|----------------------------------------------------------------|
| 5       | H...07                         | IB right ventral                       | 5§           | 8.4x7.3x7.0x6.7                         | 0                                                                    | 1                                  | 6x4                       | 2.6x1.3                           | cN0(0/9)                                               | pN1(1/21)        | 2                                                                                             |                                                                |
| 22      | H...07                         | IIA right                              | 1            | 29x18.2x8.7x8.1                         | 0                                                                    | 1                                  | 10x8                      | 3.8x2.7                           | cN0(0/9)                                               | pN1(1/11)        | 2                                                                                             |                                                                |
| 36      | H...08                         | IB left ventral                        | 1            | 12.3x9.5x7.2x6.6                        | 0                                                                    | 1                                  | 4.5x3                     | 3.2x2.6                           | cN0(0/17)                                              | pN1(1/19)        | 2                                                                                             |                                                                |
| 44      | H...08                         | III left                               | 7            | 21.8x9.5x4.5x4                          | 0                                                                    | 1                                  | 10x4.5                    | 2.2x1.7                           | cN0(0/10)                                              | pN1(1/36)        | 2                                                                                             |                                                                |
| 59      | H...09                         | IIA right                              | 1            | 29x20.3x9x7.9                           | 0                                                                    | 1                                  | 8x6                       | 6x4                               | cN0(0/17)                                              | pN2c(1/50)       | 2                                                                                             |                                                                |
| 66      | H...09                         | IIA right                              | 2§           | 19.2x15.1x5.5x5.8                       | 0                                                                    | 1                                  | 16x5                      | 5x4                               | cN0(0/16)                                              | pN1(1/19)        | 2                                                                                             |                                                                |
| 69      | H...09                         | III left caudal                        | 6            | 19.5x9.3x5.4x3.8                        | 0                                                                    | 1                                  | 7x4                       | 5x3.5                             | cN0(0/17)                                              | pN2c(1/76)       | 2                                                                                             |                                                                |
| 70      | H...09, H...09, H...09         | IIA left cranial                       | 11           | 22.2x18.5x5.8x5.7                       | 0                                                                    | 1                                  | 11x7                      | 5.5x4                             | cN0(0/23)                                              | pN2b(2/108)      | 2                                                                                             |                                                                |
|         |                                | IIA right cranial                      | V            | 22.9x17.3x5.8x5.7                       | 0                                                                    | 1                                  | 20x12                     | 2.9x1.6                           |                                                        |                  |                                                                                               |                                                                |
| 97      | H...10                         | IB right ventral                       | 2            | 9.8x7.5x4x3.7                           | 0                                                                    | 1                                  | 6x4.5                     | 5x3.5                             | cN0(0/25)                                              | pN2b(3/9)        | 2                                                                                             |                                                                |
|         |                                | IB right centered                      | 3            | 10.2x9.1x7.5x7.2                        | 0                                                                    | 1                                  | 7x5                       | 1.6x0.8                           |                                                        |                  |                                                                                               |                                                                |
|         |                                | IB right dorsal                        | 4            | 8.2x7.2x5.7x5.3                         | 0                                                                    | 1                                  | ND                        |                                   |                                                        |                  |                                                                                               |                                                                |
| 108     | H...11                         | IB left dorsal                         | 4            | 13x8.3x4.6x3.5                          | 0                                                                    | 1                                  | 5x5                       | 0.9x0.7                           | cN0(0/15)                                              | pN1(1/20)        | 2                                                                                             |                                                                |
| 111     | H...11                         | IIA left                               | 2            | 26.1x13.2x12.2x10.8                     | 0                                                                    | 1                                  | 14.5x7                    | 1.6x1.5                           | cN0(0/20)                                              | pN1(1/41) (mi)   | 2                                                                                             |                                                                |
| 116     | H...11                         |                                        |              |                                         |                                                                      |                                    |                           |                                   | cN0(0/27)                                              | pN1(1/32)        | 2                                                                                             | Metastasis in LN that was not described in the ultrasound find |
| 118     | H...11                         | IB right dorsal                        | 10           | 8.2x3.9x7.5x3.4                         | 0                                                                    | 1                                  | 4.5x4.5                   | 4.4x2                             | cN0(0/25)                                              | pN2c(3/26)       | 2                                                                                             |                                                                |
|         |                                | III left caudal                        | 12           | 13.4x4.3x11.8x4.4                       | 0                                                                    | 1                                  | 9x9                       | 6.5x3.5                           |                                                        |                  |                                                                                               |                                                                |
| 123     | H...11                         | IIA right ventral                      | 19           | 15.7x5.2x10.9x4.4                       | 0                                                                    | 1                                  | 14x8                      | 8x5                               | cN0(0/30)                                              | pN1(1/39)        | 2                                                                                             |                                                                |
| 124     | H...11                         | IIA left caudal                        | 2            | 19.8x7.2x19.5x6.5                       | 0                                                                    | 1                                  | 20x14                     | 4x1.5                             | cN0(0/24)                                              | pN2c(3/30)       | 2                                                                                             |                                                                |
|         |                                | IB right dorsal                        | 20           | 9.6x5x8.8x5.2                           | 0                                                                    | 1                                  | 17x9                      | 2x1.5                             |                                                        |                  |                                                                                               |                                                                |
|         |                                | IIA right caudal                       | 21           | 16.6x6.3x13.7x4.6                       | 0                                                                    | 1                                  | 10.5x7                    | 1.5x1                             |                                                        |                  |                                                                                               |                                                                |
| 161     | H...12                         | IIA left ventral                       | 11           | 8x4.6x7.8x4.4                           | 0                                                                    | 1                                  | 11x6                      | 4x2.5                             | cN0(0/17)                                              | pN1(1/47)        | 2                                                                                             |                                                                |
| 165     | H...13                         | III left craniodorsal                  | 21           | 12.4x3.4x12.4x4                         | 0                                                                    | 1                                  | 9x5                       | 1.5x1                             | cN0(0/19)                                              | pN1(1/25) (mi)   | 2                                                                                             |                                                                |
| 166     | H...13                         | III left caudal                        | 4            | 17.2x4.7x3.2x3.9                        | 0                                                                    | 1                                  | 6x3                       | 3x1                               | cN0(0/22)                                              | pN1(1/48)        | 2                                                                                             |                                                                |
| 193     | H...13                         | IB left ventral                        | 1            | 15.8x6.4x14.4x6.5                       | 0                                                                    | 1                                  | 12x8                      | 6x5                               | cN0(0/18)                                              | pN1(1/32)        | 2                                                                                             |                                                                |
| 194     | H...13                         | IIA right                              | 4            | 14.7x3.9x12.4x3.7                       | 0                                                                    | 1                                  | 13x10                     | 3x1                               | cN0(0/11)                                              | pN1(1/22)        | 2                                                                                             |                                                                |
| 201     | H...14                         | IIA right caudal                       | 1            | 19.3x8.2x14.7x6.7                       | 0                                                                    | 1                                  | 7x5                       | 0.3x0.3                           | cN0(0/20)                                              | pN1(1) (mi) (25) | 2                                                                                             |                                                                |
| 211     | H...14                         |                                        |              |                                         |                                                                      |                                    |                           |                                   | cN0(0/19)                                              | pN1(1/23)        | 2                                                                                             | Metastasis in LN that was not described in the ultrasound find |
| 217     | H...14                         | IB left dorsal                         | 4            | 10x6.3x9.7x6.2                          | 0                                                                    | 1                                  | 16x7                      | 6x5                               | cN0(0/25)                                              | pN1(1/28)        | 2                                                                                             |                                                                |
